# Supplementary material
Source: Springer Nature journal article supplement (https://www.springermedizin.de/resource/supplementary/12887_2005_99_MOESM11_ESM.pdf/9477266)
Supplement: MOESM11 [file 9477266]

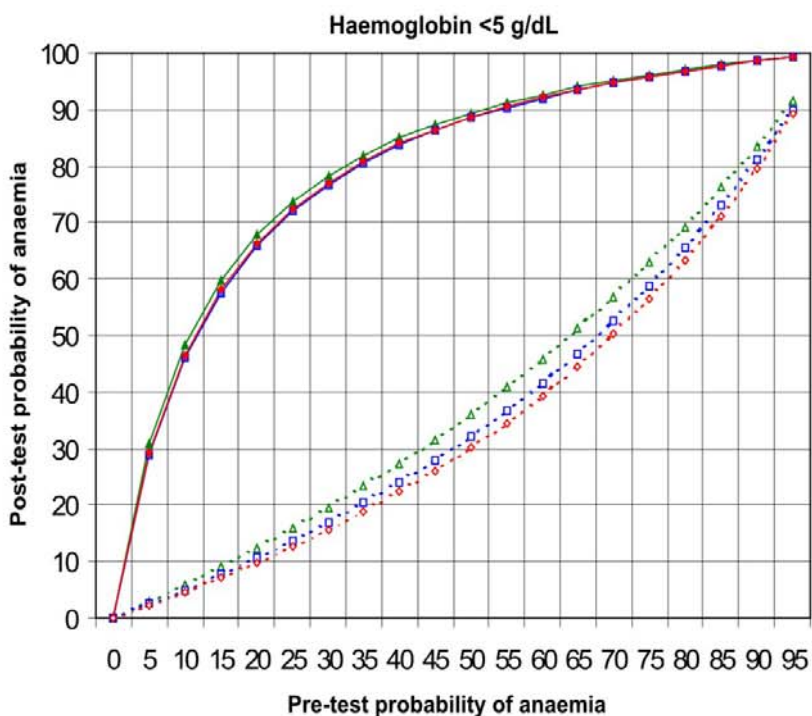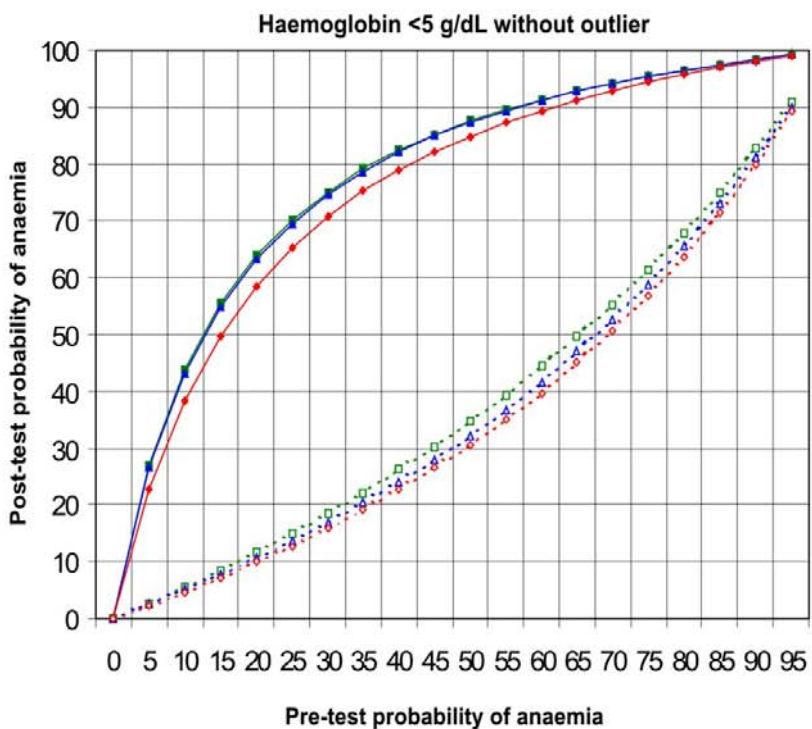

- ▲— Conjunctival pallor +
 - -▲- - Conjunctival pallor -
—■— Palmar pallor +
- -■- - Palmar pallor -
 —●— Nailbed pallor +
- -●- - Nailbed pallor -
